# Supplementary material for: Bis-pyrazolone-based dysprosium(iii) complexes: zero-field single-molecule magnet behavior in the [2 × 2] grid DyIII4 cluster
Source: Royal Society of Chemistry journal article supplement (doi:10.1039/d2ce01067d), 2022-01-01
Supplement: d2ce01067d1.pdf [file d2ce01067d1.pdf]

### Electronic supporting information

#### **Bis-pyrazolone-based dysprosium(III) complexes: zero-field single-molecule magnet behavior in the $[2 \times 2]$ grid $Dy^{III}_4$ cluster**

Tesfay G. Ashebr,<sup>a,b,c</sup> Xiao-Lei Li,<sup>a</sup> Chen Zhao<sup>a,b</sup> Qianqian Yang,<sup>a,b</sup> and Jinkui Tang<sup>\*a,b</sup>

<sup>a</sup> State Key Laboratory of Rare Earth Resource Utilization, Changchun Institute of Applied Chemistry, Chinese Academy of Sciences, Changchun 130022, P. R. China. E-mail: tang@ciac.ac.cn

<sup>b</sup> School of Applied Chemistry and Engineering, University of Science and Technology of China, Hefei 230026, P. R. China

<sup>c</sup> Department of Industrial Chemistry, Addis Ababa Science and Technology University, P. O. Box 16417, Addis Ababa, Ethiopia

## Ligand synthesis Scheme

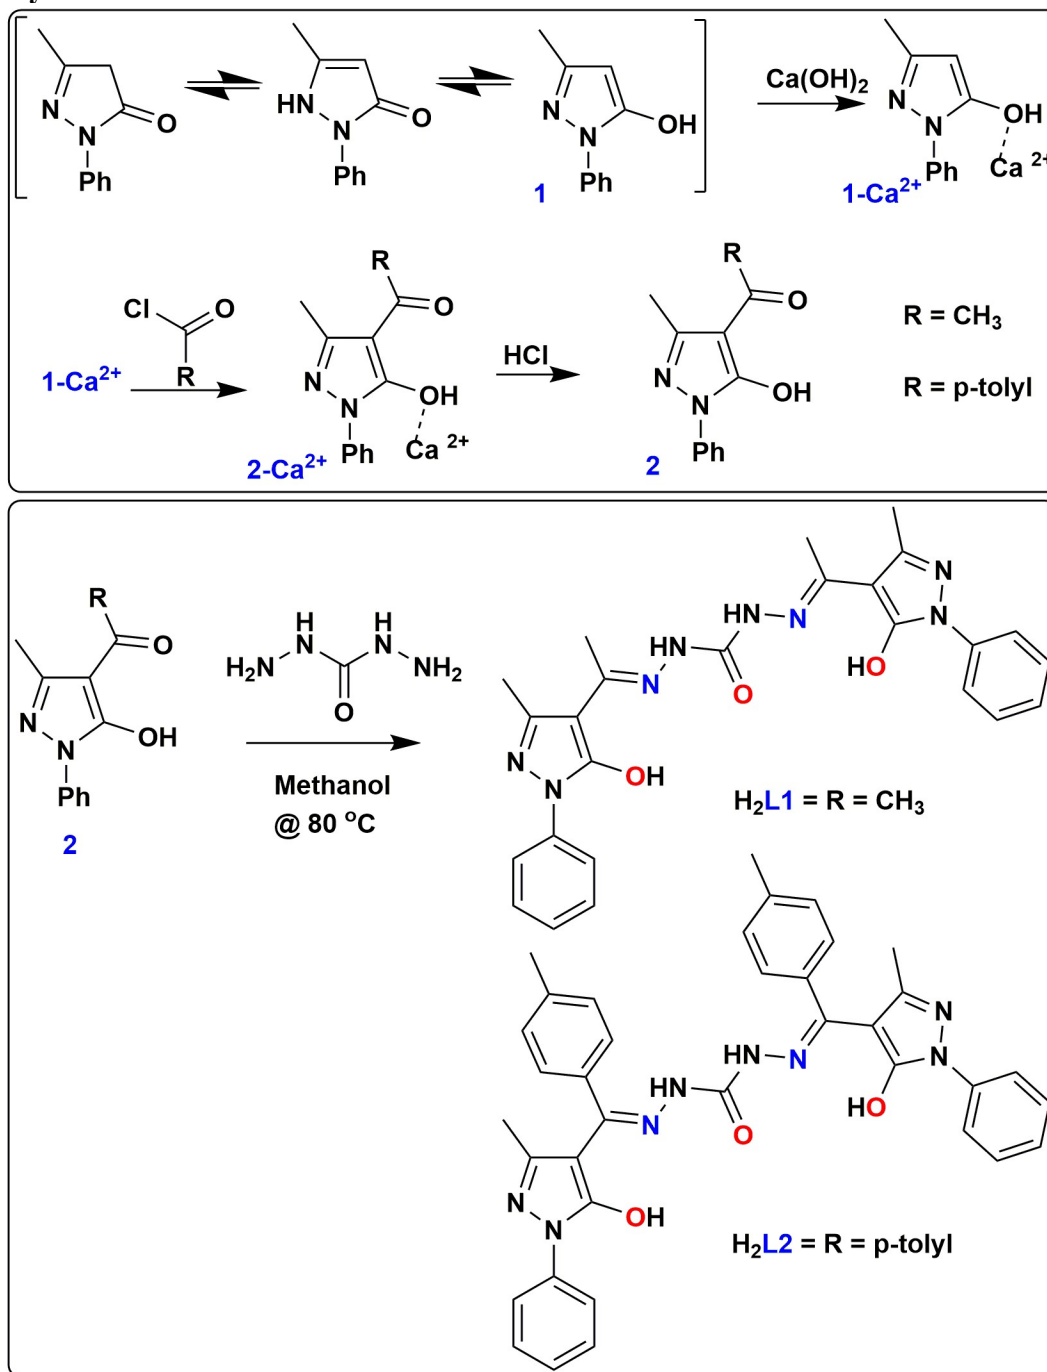

**Scheme S1.** Jensen's method<sup>1</sup> for pyrazolone-based ketones synthesis (top box) and ligands (H<sub>2</sub>L1 and H<sub>2</sub>L2) synthesis (bottom box).

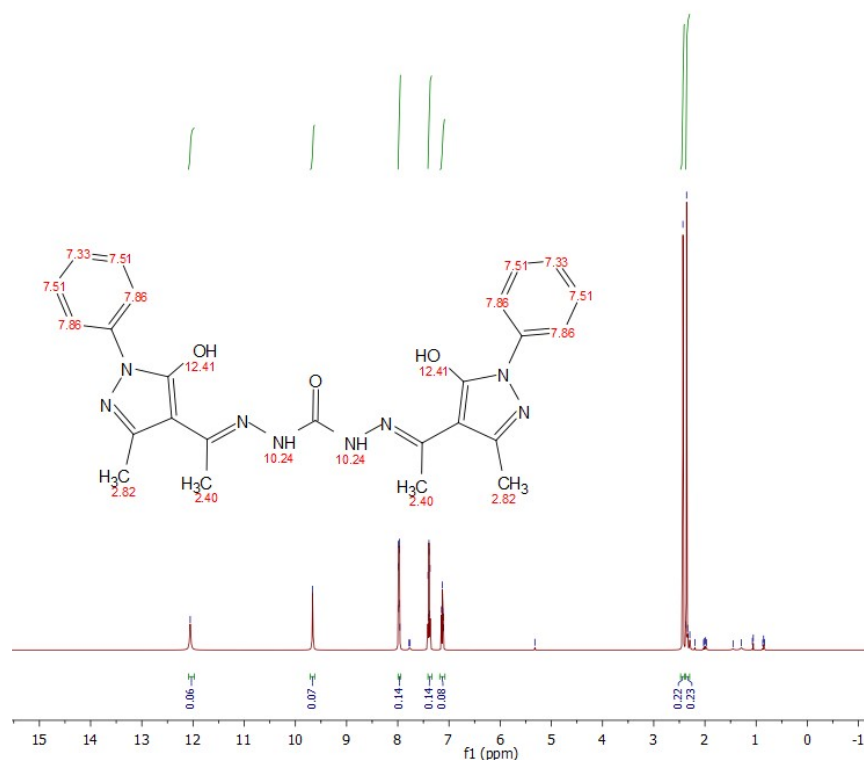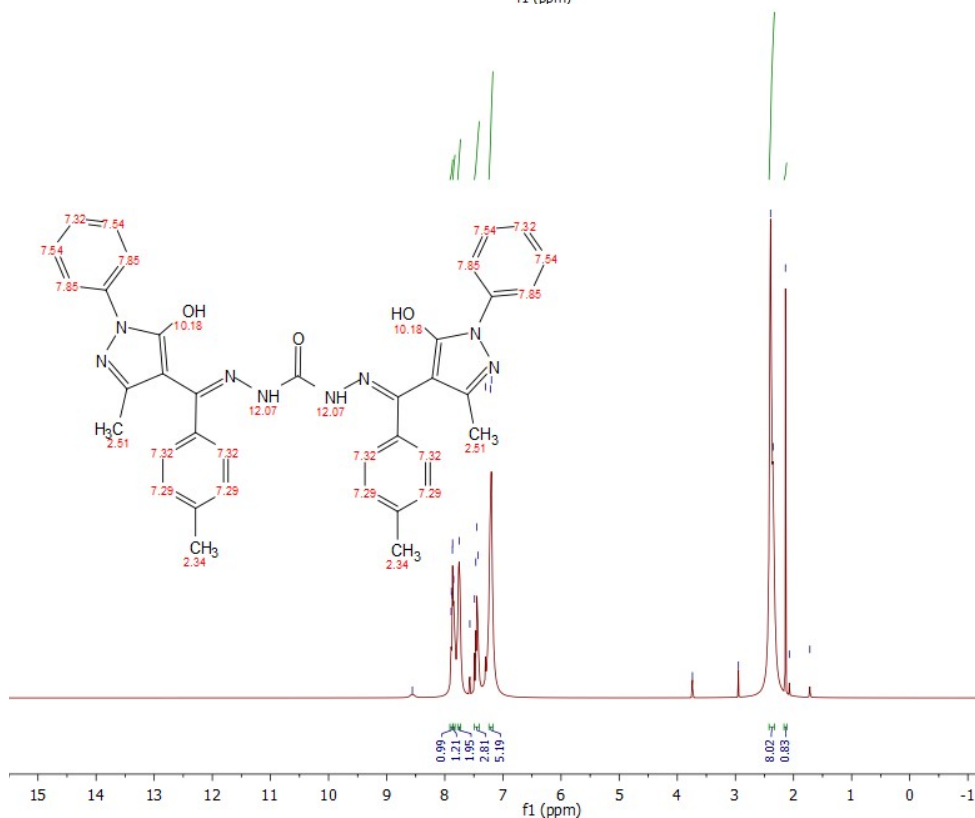

**Fig. S1.**  $^1H$ NMR of  $H_2L1$  in DMSO (top) and  $H_2L2$  in  $CDCl_3$  (bottom). Red numbers are the simulated chemical shifts (ppm).

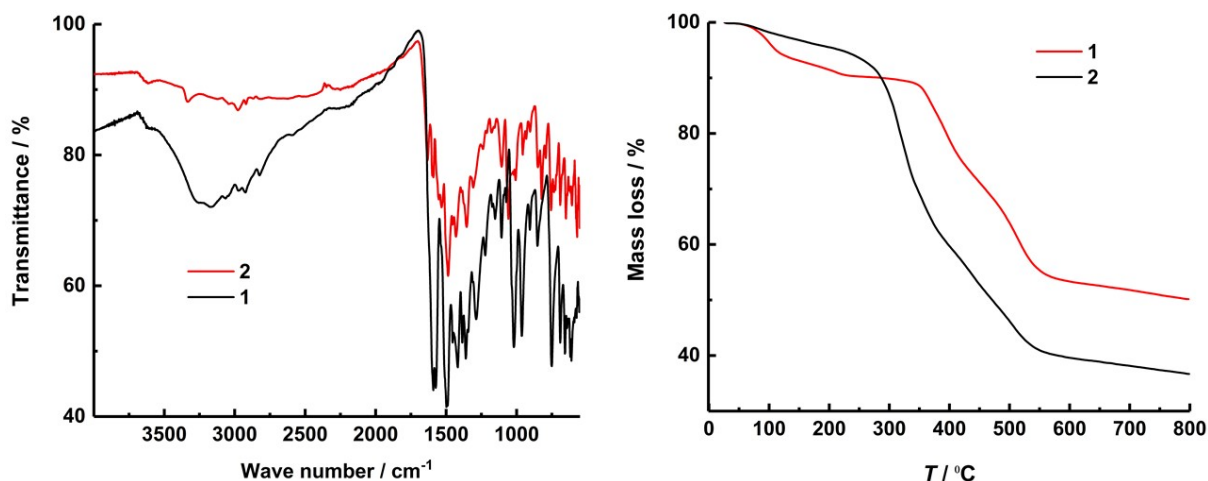

**Fig. S2.** FT-IR (ATR) spectrum of solid samples for complexes of **1** and **2** (left) and TGA curves in powder forms showing weight loss of co-crystallized solvents as well as masked solvents in the thermal stability range, and weight loss with degradation above 380 °C for **1** and 300°C for **2** at scan rate: 3 °C/min in N<sub>2</sub> atmosphere (right).

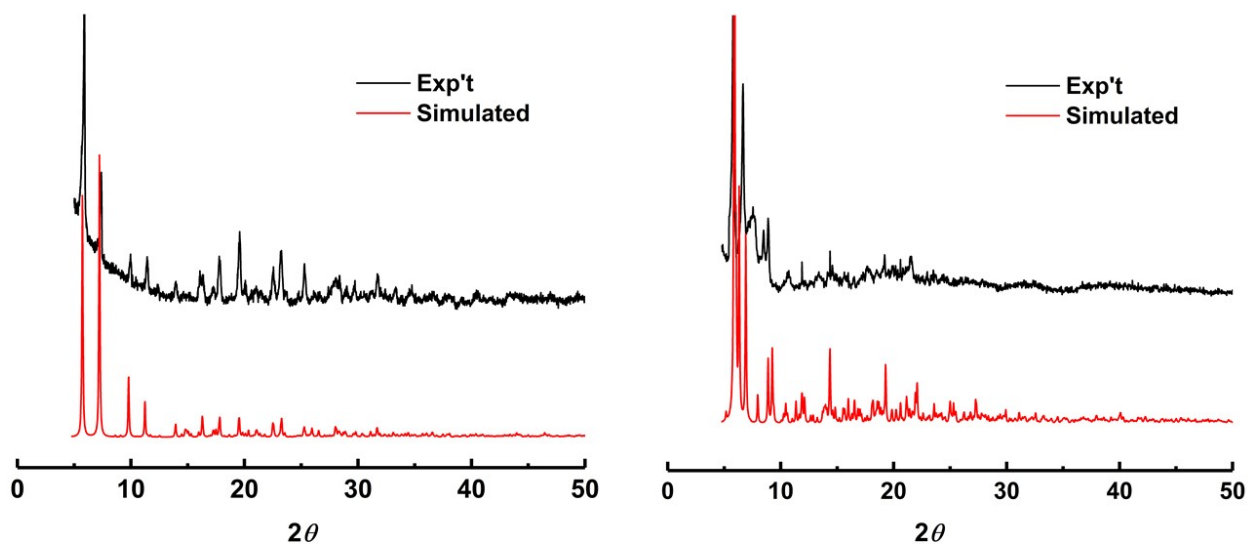

**Fig. S3.** Experimental and simulated X-ray powder diffraction (P-XRD) patterns for **1** (left) and **2** (right).

## Crystal structure

Table S1 Crystallographic information for complexes **1** and **2**.<sup>2a&b</sup>

| Compound reference                                             | <b>1</b>                                                                          | <b>2</b>                                                                          |
|----------------------------------------------------------------|-----------------------------------------------------------------------------------|-----------------------------------------------------------------------------------|
| Chemical formula                                               | C <sub>102</sub> H <sub>108</sub> Dy <sub>4</sub> N <sub>32</sub> O <sub>18</sub> | C <sub>164</sub> H <sub>166</sub> Dy <sub>2</sub> N <sub>36</sub> O <sub>12</sub> |
| Formula Mass g/mol                                             | 2720.2                                                                            | 3158.32                                                                           |
| Crystal system                                                 | monoclinic                                                                        | monoclinic                                                                        |
| <i>a</i> (Å)                                                   | 19.8689(16)                                                                       | 35.329(3)                                                                         |
| <i>b</i> (Å)                                                   | 31.487(3)                                                                         | 16.6830(14)                                                                       |
| <i>c</i> (Å)                                                   | 21.8015(16)                                                                       | 30.194(2)                                                                         |
| $\alpha$ (°)                                                   | 90                                                                                | 90                                                                                |
| $\beta$ (°)                                                    | 116.894(3)                                                                        | 104.510(3)                                                                        |
| $\gamma$ (°)                                                   | 90                                                                                | 90                                                                                |
| Unit cell volume (Å <sup>3</sup> )                             | 12164.2(17)                                                                       | 17228(2)                                                                          |
| Temperature (K)                                                | 300                                                                               | 180                                                                               |
| Space group                                                    | <i>C2/c</i> (no.15)                                                               | <i>C2/c</i> (no.14)                                                               |
| <i>Z</i>                                                       | 4                                                                                 | 4                                                                                 |
| $\rho_{\text{calc}}$ (g/cm <sup>3</sup> )                      | 1.483                                                                             | 1.218                                                                             |
| <i>F</i> (000)                                                 | 5400.0                                                                            | 6520.0                                                                            |
| Radiation ( $\lambda = 0.71073$ )                              | Mo-K $\alpha$                                                                     | Mo-K $\alpha$                                                                     |
| Reflections collected                                          | 116732                                                                            | 66146                                                                             |
| Independent reflections                                        | 16372                                                                             | 15339                                                                             |
| <i>R</i> <sub>int</sub>                                        | 0.0625                                                                            | 0.1414                                                                            |
| GOF on <i>F</i> <sup>2</sup>                                   | 1.518                                                                             | 1.013                                                                             |
| <i>R</i> <sub>1</sub> ( <i>I</i> $\geq 2 \sigma$ ( <i>I</i> )) | 0.1195                                                                            | 0.0778                                                                            |
| <i>wR</i> <sub>2</sub> (all data)                              | 0.4113                                                                            | 0.2455                                                                            |
| CCDC number                                                    | 2181104                                                                           | 2181105                                                                           |

**Table S2** Selected important bond distances and bond angles of **1** and **2**.

| <b>Complex 1</b>                      |                           |                                      |                        |
|---------------------------------------|---------------------------|--------------------------------------|------------------------|
| <b>Atoms</b>                          | <b>Bond distances [Å]</b> | <b>Atoms</b>                         | <b>Bond angles [°]</b> |
| Dy1-O1                                | 2.379(13)                 | O3-Dy1-O1                            | 137.4(5)               |
| Dy1-O2                                | 2.4200(9)                 | O3-Dy1-O2                            | 154.8(4)               |
| Dy1-O3                                | 2.270(15)                 | O4-Dy1-O5                            | 135.8(5)               |
| Dy1-O4                                | 2.211(17)                 | O4-Dy1-O7 <sup>i</sup>               | 155.5(5)               |
| Dy1-O5                                | 2.345(12)                 | O5-Dy1-O1                            | 135.3(5)               |
| Dy1-O7 <sup>i</sup>                   | 2.3387(8)                 | N3-Dy1-N1                            | 141.5(5)               |
| Dy1-N1                                | 2.619(16)                 | O5 <sup>i</sup> -Dy2-O1              | 131.6(4)               |
| Dy1-N3                                | 2.592(17)                 | O6 <sup>i</sup> -Dy2-O5 <sup>i</sup> | 133.0(5)               |
| Dy2-O1                                | 2.442(14)                 | O6 <sup>i</sup> -Dy2-O7              | 156.9(4)               |
| Dy2-O2                                | 2.3903(8)                 | O9-Dy2-O1                            | 132.7(5)               |
| Dy2-O5 <sup>i</sup>                   | 2.412(13)                 | O9-Dy2-O2                            | 160.3(4)               |
| Dy2-O6 <sup>i</sup>                   | 2.235(14)                 | N7-Dy2-N6                            | 132.6(6)               |
| Dy2-O7                                | 2.2719(8)                 |                                      |                        |
| Dy2-O9                                | 2.271(14)                 |                                      |                        |
| Dy2-N2                                | 2.596(17)                 |                                      |                        |
| Dy2-N13 <sup>i</sup>                  | 2.532(17)                 |                                      |                        |
| Dy1...Dy2                             | 4.0086(15)                |                                      |                        |
| Dy1...Dy2 <sup>i</sup>                | 3.8695(12)                |                                      |                        |
| Dy...Dy <sub>(packing-shortest)</sub> | 9.9726(5)                 |                                      |                        |

  

| <b>Complex 2</b>                      |                           |                                      |                        |
|---------------------------------------|---------------------------|--------------------------------------|------------------------|
| <b>Atoms</b>                          | <b>Bond distances [Å]</b> | <b>Atoms</b>                         | <b>Bond angles [°]</b> |
| Dy1-O2                                | 2.192(6)                  | O2-Dy1-O1                            | 138.8(2)               |
| Dy1-O3                                | 2.262(6)                  | O3-Dy1-O5 <sup>i</sup>               | 150.2(2)               |
| Dy1-O1                                | 2.372(6)                  | O4 <sup>i</sup> -Dy1-O1              | 133.2(2)               |
| Dy1-O4 <sup>i</sup>                   | 2.360(5)                  | O5 <sup>i</sup> -Dy1-O4 <sup>i</sup> | 138.1(2)               |
| Dy1-O5 <sup>i</sup>                   | 2.279(6)                  | N15 <sup>i</sup> -Dy1-N2             | 139.2(2)               |
| Dy1-N2                                | 2.565(7)                  | N1-Dy1-N2                            | 135.5(3)               |
| Dy1-N15 <sup>i</sup>                  | 2.565(8)                  |                                      |                        |
| Dy1-N1                                | 2.535(11)                 |                                      |                        |
| Dy1...Dy1 <sup>i</sup>                | 7.1451(9)                 |                                      |                        |
| Dy...Dy <sub>(packing-shortest)</sub> | 10.0499(11)               |                                      |                        |

## Shape analysis

**Table S3** The CShM values calculated by SHAPE 2.1 for complexes of **1** and **2** (highlighted are the shape of the complexes).<sup>2c</sup>

| Coordination Geometry                                   | Complexes |        |          |
|---------------------------------------------------------|-----------|--------|----------|
|                                                         | <b>1</b>  |        | <b>2</b> |
|                                                         | Dy1       | Dy2    | Dy1      |
| Hexagonal bipyramid ( $D_{6h}$ )                        | 13.636    | 12.185 | 14.718   |
| Cube ( $O_h$ )                                          | 11.053    | 10.217 | 12.691   |
| Square antiprism ( $D_{4d}$ )                           | 3.027     | 4.740  | 3.150    |
| Triangular dodecahedron ( $D_{2d}$ )                    | 1.888     | 2.653  | 1.315    |
| Johnson gyrobifastigium J26 ( $D_{2d}$ )                | 9.937     | 9.529  | 10.544   |
| Johnson elongated triangular bipyramid J14 ( $D_{3h}$ ) | 25.591    | 24.771 | 26.475   |
| Biaugmented trigonal prism J50 ( $C_{2v}$ )             | 2.482     | 3.645  | 2.237    |
| Biaugmented trigonal prism ( $C_{2v}$ )                 | 2.254     | 3.142  | 2.028    |
| Snub diphenoid J84 ( $D_{2d}$ )                         | 2.224     | 2.394  | 2.136    |

## Crystal structure details

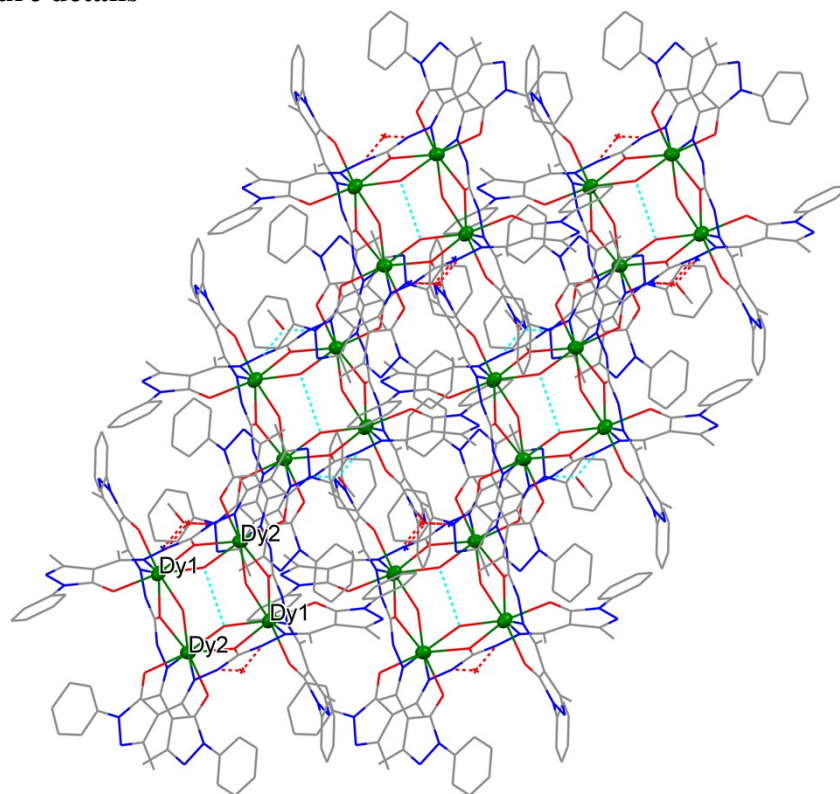

**Fig. S4.** Packing model along with b axis view of complex **1** respectively. Color code; green, Dy; red, O; blue, N; gray, C.

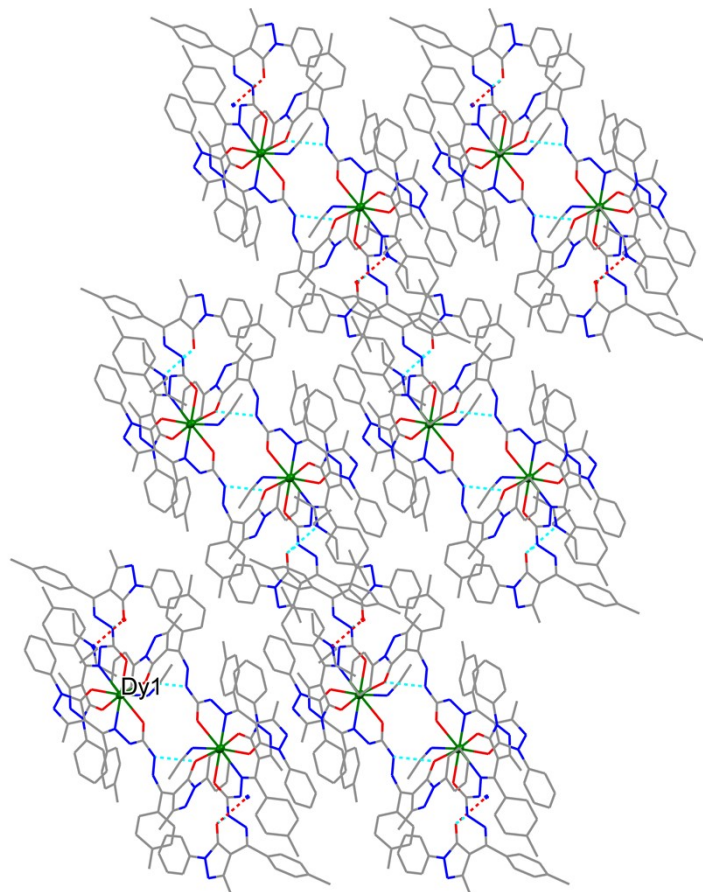

**Fig. S5.** Packing model along with b axis view of complex **2** respectively. Color code; green, Dy; red, O; blue, N; gray, C.

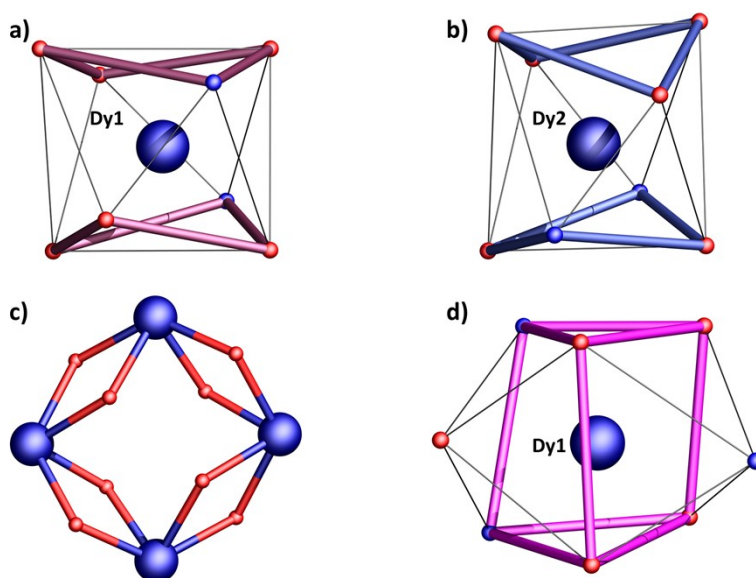

**Fig. S6.** (a, b) Coordination polyhedra observed around the central metal atoms of complex of **1**. (c)  $\mu_2\text{-O}_{\text{carbonyl}}$  and  $\mu_2\text{-OH}^-$  bridging motifs for complex **1** in b axis view. (d) Coordination polyhedra observed in complex **2**. Color code; dark blue, Dy; red, O; blue, N.



## Magnetism

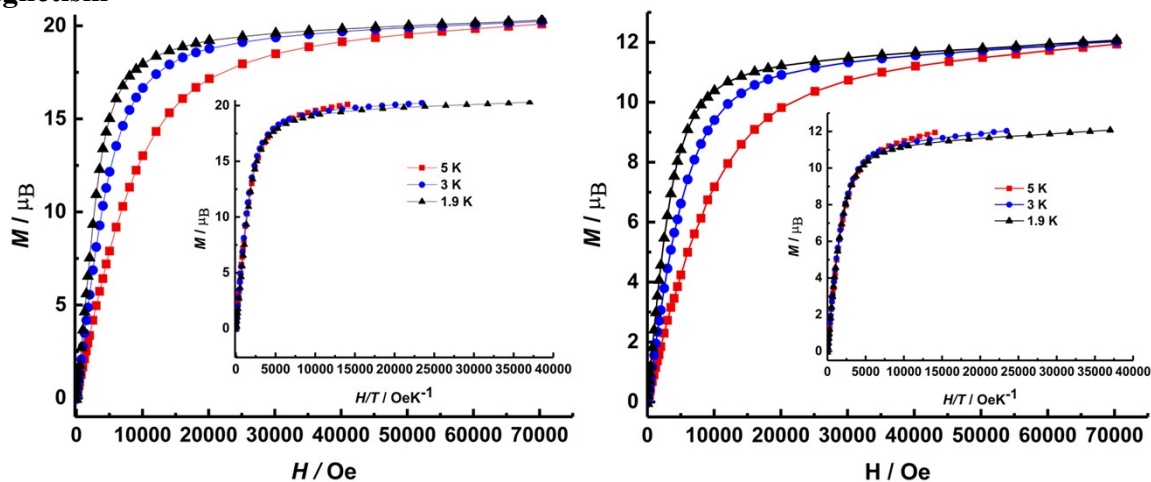

**Fig. S7.** Molar magnetization ( $M$ ) vs. magnetic field ( $H$ ) at 1.9, 3.0, and 5.0 K. for **1** (left) and **2** (right). Insets are the  $M$  vs  $H/T$  plots at the same temperature values.

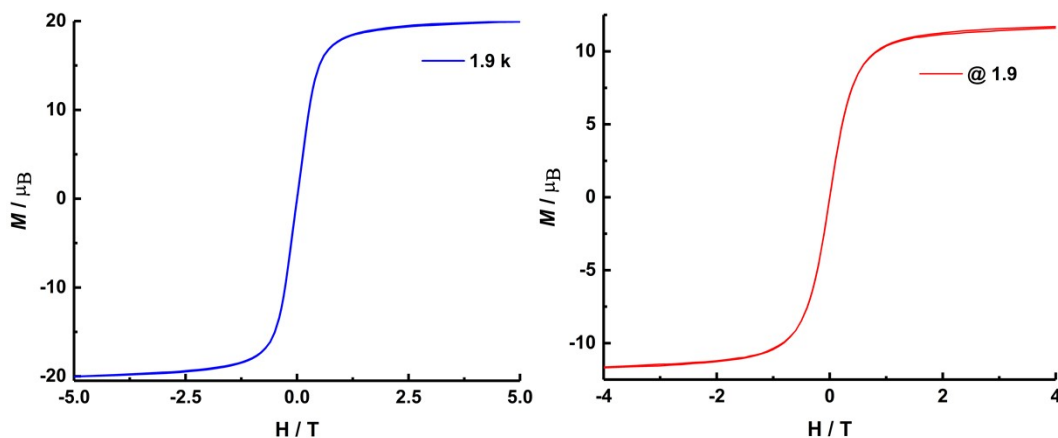

**Fig. S8.** Magnetic hysteresis loops at 1.9 K for **1** (left) and **2** (right) respectively.

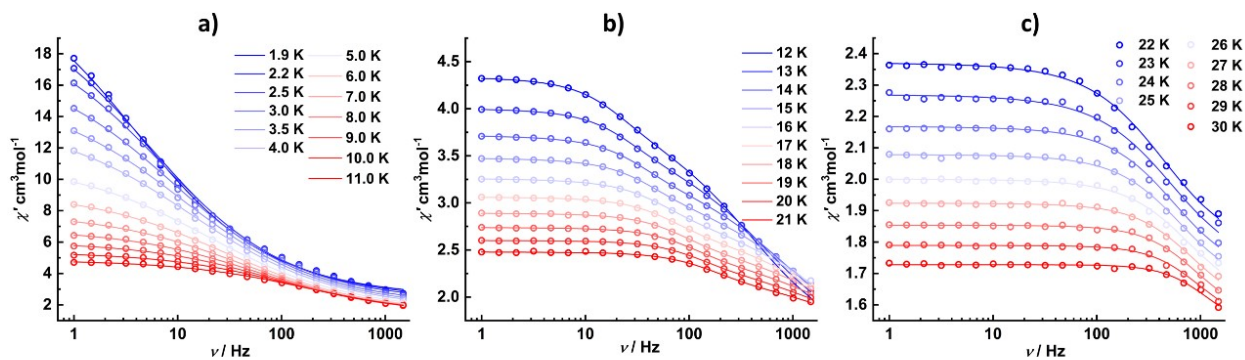

**Fig. S9.** Frequency-dependent in-phase ( $\chi'$ ) plots for complex **1** (a; 1.9–11 K; b; 12–21 K; c; 22–30 K) where the solid lines represent fitting of the experimental data at different temperatures using the generalized Debye functions.

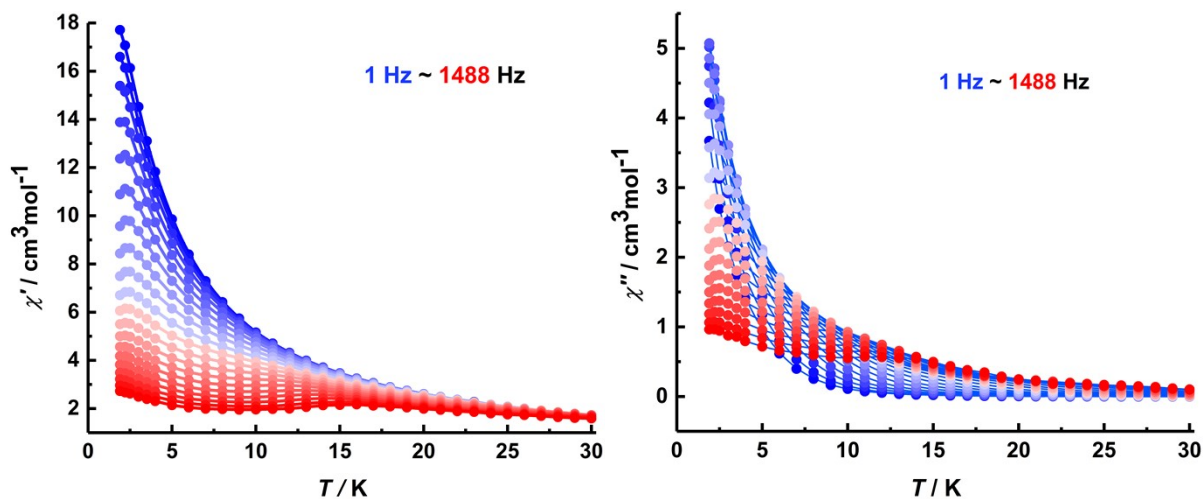

**Fig. S10.** Plots of ac susceptibility vs. temperature oscillating at 1–1488 Hz for **1** in the temperature range of 1–30 K.

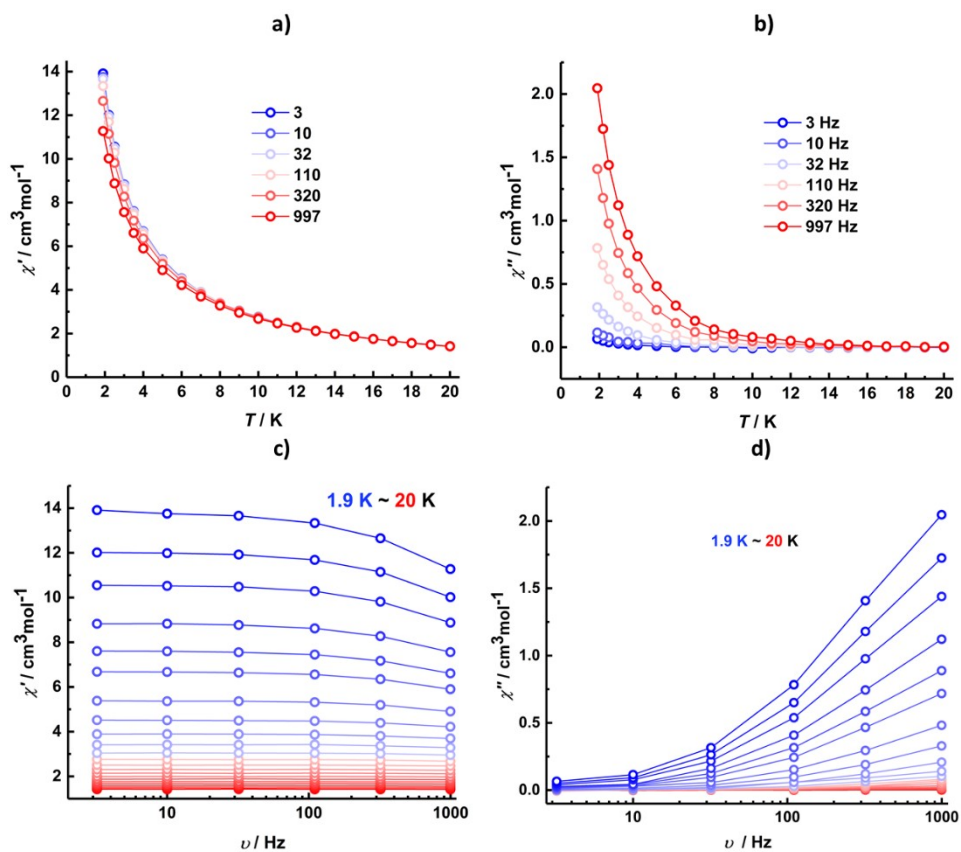

**Fig. S11.** Temperature- (a and b) and frequency- (c and d) dependent in-phase ( $\chi'$ ) and out-of-phase ( $\chi''$ ) plots for complex **2**.

**Table S4** Relaxation fitting parameters for **1** from 1.9–11 K under a zero applied dc field.

| $T$ (K) | $\chi_S$ (cm <sup>3</sup> mol <sup>-1</sup> ) | $\chi_T$ (cm <sup>3</sup> mol <sup>-1</sup> ) | $\tau$ (s)   | $\alpha$ |
|---------|-----------------------------------------------|-----------------------------------------------|--------------|----------|
| 1.9     | 0.244302E+01                                  | 0.237250E+02                                  | 0.407292E-01 | 0.452653 |
| 2.2     | 0.230710E+01                                  | 0.219275E+02                                  | 0.300442E-01 | 0.451899 |
| 2.5     | 0.215060E+01                                  | 0.201494E+02                                  | 0.236667E-01 | 0.455965 |
| 3.0     | 0.193824E+01                                  | 0.176420E+02                                  | 0.178974E-01 | 0.463755 |
| 3.5     | 0.177603E+01                                  | 0.155958E+02                                  | 0.143137E-01 | 0.470324 |
| 4.0     | 0.166856E+01                                  | 0.138381E+02                                  | 0.117908E-01 | 0.474905 |
| 5.0     | 0.151163E+01                                  | 0.112150E+02                                  | 0.822111E-02 | 0.478405 |
| 6.0     | 0.141882E+01                                  | 0.931003E+01                                  | 0.569513E-02 | 0.473999 |
| 7.0     | 0.137936E+01                                  | 0.790958E+01                                  | 0.394733E-02 | 0.465300 |
| 8.0     | 0.138592E+01                                  | 0.684161E+01                                  | 0.278597E-02 | 0.451078 |
| 9.0     | 0.136839E+01                                  | 0.602635E+01                                  | 0.196012E-02 | 0.440453 |
| 10      | 0.134842E+01                                  | 0.537597E+01                                  | 0.135701E-02 | 0.433796 |
| 11      | 0.128974E+01                                  | 0.486046E+01                                  | 0.906202E-03 | 0.436270 |

**Table S5.** Relaxation fitting parameters for Cole-Cole plots of complex **1** from 12–20 K under zero applied dc-field using the sum of two modified Debye model.<sup>3</sup>

| $T$ (K) | $\chi_{S, \text{tot}}$ | $\Delta\chi_1$ | $\Delta\chi_2$ | $\tau_1$ (s) | $\alpha_1$ | $\tau_2$ (s) | $\alpha_2$ |
|---------|------------------------|----------------|----------------|--------------|------------|--------------|------------|
| 12      | 1.42510                | 2.40066        | 0.516387       | 0.391390E-03 | 0.318525   | 0.719803E-02 | 0.0153567  |
| 13      | 1.44414                | 2.08292        | 0.478638       | 0.277929E-03 | 0.312141   | 0.576194E-02 | 0.0213190  |
| 14      | 1.33835                | 1.97086        | 0.412387       | 0.178970E-03 | 0.352765   | 0.444365E-02 | 0.0120980  |
| 15      | 1.43628                | 1.63171        | 0.410770       | 0.147122E-03 | 0.337643   | 0.357631E-02 | 0.0229492  |
| 16      | 1.35527                | 1.53223        | 0.374984       | 0.986820E-04 | 0.369387   | 0.277951E-02 | 0.0244597  |
| 17      | 1.47811                | 1.20463        | 0.380564       | 0.945778E-04 | 0.322669   | 0.225593E-02 | 0.0315500  |
| 18      | 1.38198                | 1.16456        | 0.346569       | 0.657789E-04 | 0.354753   | 0.178916E-02 | 0.0173057  |
| 19      | 1.54859                | 8.59057        | 0.331244       | 0.817678E-04 | 0.308199   | 0.146326E-02 | 0.0225898  |
| 20      | 1.61308                | 6.79801        | 0.307738       | 0.914746E-04 | 0.276907   | 0.122509E-02 | 0.0277862  |

## References

1. B. S. Jensen, *Acta Chem. Scand.*, 1959, **13**, 1668-1670.
2. (a) Sheldrick, G. M., *Acta Crystallogr. Sect. A* 2015, **71**, 3-8. (b) Sheldrick, G. M., *Acta Crystallogr. Sect. C Struct. Chem.* 2015, **71**, 3-8. (c) D. Casanova, M. Llunell, P. Alemany and S. Alvarez, *Chem. Eur. J.*, 2005, **11**, 1479-1494.
3. Y.-N. Guo, G.-F. Xu, Y. Guo and J. Tang, *Dalton Trans.*, 2011, **40**, 9953-9963.
